# Supplementary material
Source: PubMed Central journal article supplement (PMC2790562)
Supplement: mmc1.pdf [file mmc1.pdf]

**Supplemental Data**

***AJHG*, Volume 85**

**Short Telomeres are Sufficient to Cause the  
Degenerative Defects Associated with Aging**

**Mary Armanios, Jonathan K. Alder, Erin M. Parry, Baktiar Karim, Margaret A. Strong, and Carol W. Greider**

**Figure S1. SLAM Cells Have a Similar Frequency in Wildtype Cast/EiJ and C57BL/6 Mouse Strains.**

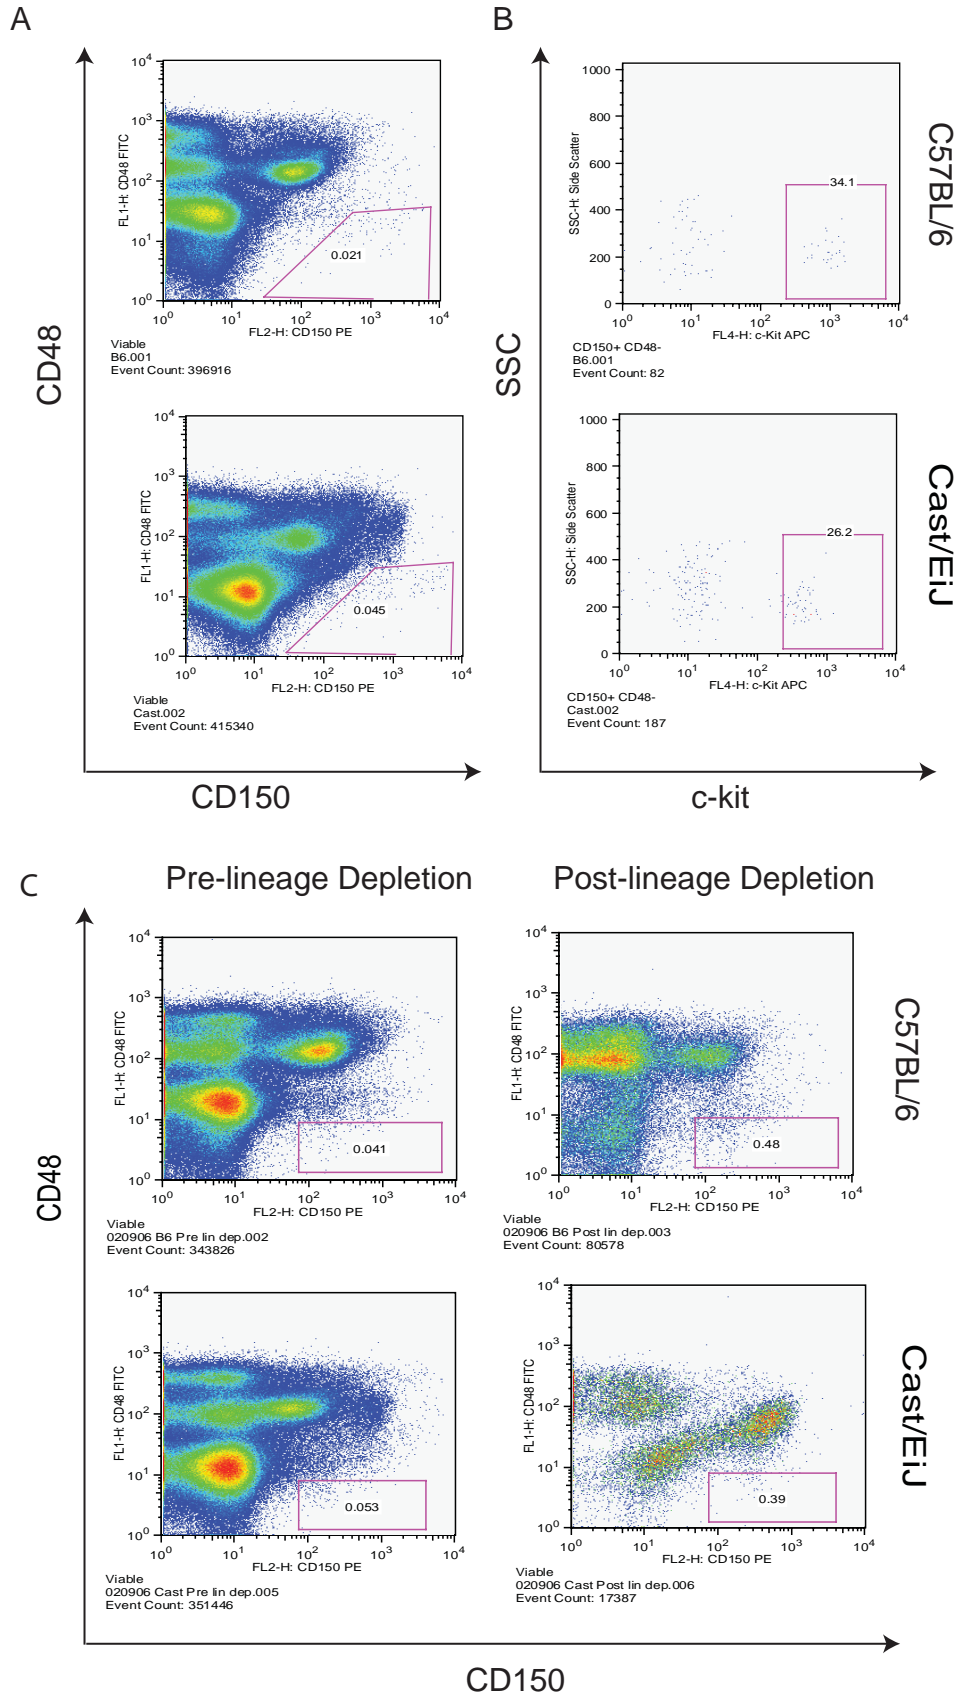

**(A)** FACS plot of CD150+CD48- cells in whole bone marrow shows a similar frequency of SLAM cells ~0.04%. **(B)** In both strains, ~30% of these cells are c-kit+. **(C)** Depletion of lineage committed cells leads to a 10-fold enrichment of SLAM cells. These data are consistent with the fact that this is a stem-progenitor population in Cast/EiJ mice.

**Figure S2. Wildtype Telomerase Elongates Telomeres Incrementally Across Generations, Example of HG3 family is Shown.**

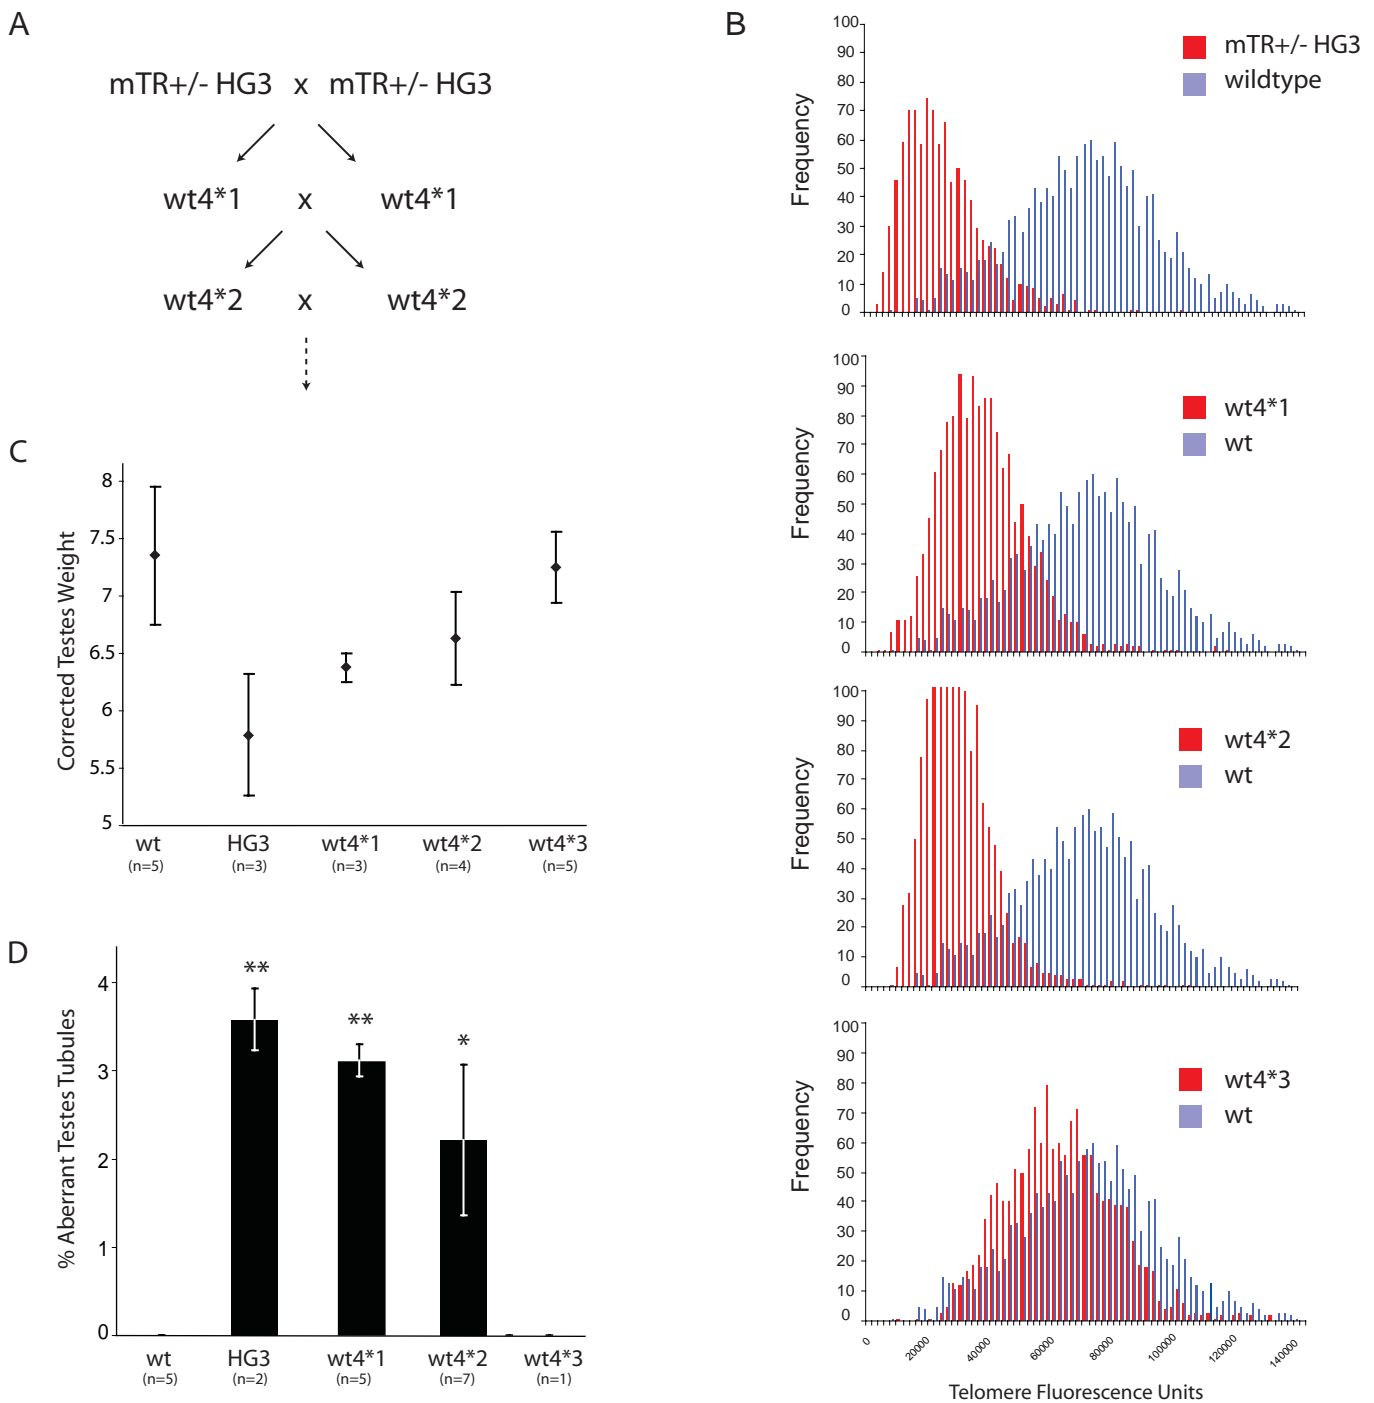

**(A)** Breeding scheme of wt\* mice with nomenclature. **(B)** Frequency distribution of telomere length as examined by quantitative FISH on metaphase splenocytes for each wt\* generation compared with true wildtypes are shown in each panel (2 mice/group). Degenerative phenotypes resolve with successive telomere elongation as shown by an increase in testes weight **(C)** and the decreasing frequency of aberrant tubules in **(D)**. The number of examined mice is shown below each column and testes weight was corrected for body weight. Mice were 6 months of age. Error bars represent standard error of the mean.
